# Supplementary material for: Combined Transcriptomic and Metabolomic Analysis Reveals the Role of Phenylpropanoid Biosynthesis Pathway in the Salt Tolerance Process of Sophora alopecuroides
Source: PubMed Central journal article supplement (PMC7957753; doi:10.3390/ijms22052399), 2021-02-27
Supplement: ijms-22-02399-s001.pdf [file ijms-22-02399-s001.pdf]

**Table S1** Summary of Sample sequencing data quality

| sample | raw_reads | clean_reads | clean_bases | error_rate | Q20   | Q30   | GC_pct |
|--------|-----------|-------------|-------------|------------|-------|-------|--------|
| CK_1   | 23313954  | 22226559    | 6.67G       | 0.02       | 98.21 | 94.42 | 43.9   |
| CK_2   | 23220577  | 22178023    | 6.65G       | 0.02       | 98.22 | 94.38 | 43.24  |
| CK_3   | 22869484  | 22042152    | 6.61G       | 0.03       | 98.01 | 93.83 | 43.42  |
| T4_1   | 22355069  | 21527193    | 6.46G       | 0.02       | 98.18 | 94.29 | 43.6   |
| T4_2   | 20404002  | 19610694    | 5.88G       | 0.03       | 98.09 | 94.03 | 43.46  |
| T4_3   | 22514859  | 21636674    | 6.49G       | 0.03       | 98.01 | 93.88 | 43.5   |
| T24_1  | 23155574  | 22404348    | 6.72G       | 0.03       | 98.09 | 94.07 | 43.76  |
| T24_2  | 23675738  | 22901075    | 6.87G       | 0.03       | 97.8  | 93.37 | 43.58  |
| T24_3  | 22927443  | 21985614    | 6.6G        | 0.03       | 98.05 | 94.04 | 43.77  |
| T48_1  | 23198775  | 22409737    | 6.72G       | 0.03       | 97.99 | 93.89 | 43.52  |
| T48_2  | 22845598  | 22107440    | 6.63G       | 0.02       | 98.17 | 94.26 | 43.49  |
| T48_3  | 22698775  | 21813870    | 6.54G       | 0.03       | 97.96 | 93.85 | 43.6   |
| T72_1  | 22971748  | 22716883    | 6.82G       | 0.01       | 97.03 | 93.06 | 43.18  |
| T72_2  | 23046137  | 22645899    | 6.79G       | 0.01       | 97.7  | 94.19 | 43.46  |
| T72_3  | 23318379  | 22999675    | 6.9G        | 0.01       | 97.75 | 94.27 | 43.43  |

**Table S2** Statistical results of differential genes

| compare  | all   | up    | down | threshold                          |
|----------|-------|-------|------|------------------------------------|
| T4vsCK   | 2953  | 1764  | 1189 | DESeq2 padj<0.05 log2FoldChange >1 |
| T24vsCK  | 2218  | 1133  | 1085 | DESeq2 padj<0.05 log2FoldChange >1 |
| T48vsCK  | 834   | 378   | 456  | DESeq2 padj<0.05 log2FoldChange >1 |
| T72vsCK  | 21639 | 16814 | 4825 | DESeq2 padj<0.05 log2FoldChange >1 |
| T24vsT4  | 609   | 316   | 293  | DESeq2 padj<0.05 log2FoldChange >1 |
| T48vsT24 | 194   | 24    | 170  | DESeq2 padj<0.05 log2FoldChange >1 |
| T72vsT48 | 18760 | 15594 | 3166 | DESeq2 padj<0.05 log2FoldChange >1 |

**Table S3** Statistical analysis of KEGG pathway enriched by differentially expressed genes

| group    | ID      | pathway_term                                          | rich_factor | qvalue    | gene_number |
|----------|---------|-------------------------------------------------------|-------------|-----------|-------------|
| T4_vs_CK | ko04075 | Plant hormone signal transduction                     | 0.122137405 | 7.08E-20  | 48          |
|          | ko00940 | Phenylpropanoid biosynthesis                          | 0.099337748 | 2.50E-10  | 30          |
|          | ko00910 | Nitrogen metabolism                                   | 0.114864865 | 1.02E-06  | 17          |
|          | ko00906 | Carotenoid biosynthesis                               | 0.192307692 | 8.36E-06  | 10          |
|          | ko00500 | Starch and sucrose metabolism                         | 0.054421769 | 1.71E-05  | 32          |
|          | ko00052 | Galactose metabolism                                  | 0.076923077 | 2.58E-05  | 19          |
|          | ko00945 | Stilbenoid, diarylheptanoid and gingerol biosynthesis | 0.25        | 6.37E-05  | 7           |
|          | ko00904 | Diterpenoid biosynthesis                              | 0.260869565 | 0.0002222 | 6           |
|          | ko00250 | Alanine, aspartate and glutamate metabolism           | 0.051515152 | 0.005626  | 17          |
|          | ko00908 | Zeatin biosynthesis                                   | 0.166666667 | 0.005626  | 5           |
|          | ko00941 | Flavonoid biosynthesis                                | 0.117647059 | 0.0077545 | 6           |

|           |         |                                          |             |           |      |
|-----------|---------|------------------------------------------|-------------|-----------|------|
|           | ko00040 | Pentose and glucuronate interconversions | 0.052434457 | 0.0118706 | 14   |
|           | ko04626 | Plant-pathogen interaction               | 0.040669856 | 0.0455227 | 17   |
|           | ko04075 | Plant hormone signal transduction        | 0.1043257   | 4.20E-20  | 41   |
|           | ko00940 | Phenylpropanoid biosynthesis             | 0.099337748 | 2.96E-14  | 30   |
|           | ko04626 | Plant-pathogen interaction               | 0.055023923 | 2.30E-06  | 23   |
|           | ko00040 | Pentose and glucuronate interconversions | 0.063670412 | 1.32E-05  | 17   |
| T24_vs_CK | ko00500 | Starch and sucrose metabolism            | 0.040816327 | 0.0001134 | 24   |
|           | ko00910 | Nitrogen metabolism                      | 0.074324324 | 0.0002245 | 11   |
|           | ko00904 | Diterpenoid biosynthesis                 | 0.173913043 | 0.0063015 | 4    |
|           | ko00908 | Zeatin biosynthesis                      | 0.133333333 | 0.0134926 | 4    |
|           | ko00360 | Phenylalanine metabolism                 | 0.049689441 | 0.0257011 | 8    |
|           | ko00040 | Pentose and glucuronate interconversions | 0.071161049 | 3.70E-13  | 19   |
|           | ko04075 | Plant hormone signal transduction        | 0.040712468 | 6.95E-08  | 16   |
|           | ko00940 | Phenylpropanoid biosynthesis             | 0.036423841 | 3.64E-05  | 11   |
| T48_vs_CK | ko00500 | Starch and sucrose metabolism            | 0.025510204 | 3.64E-05  | 15   |
|           | ko00904 | Diterpenoid biosynthesis                 | 0.130434783 | 0.0047809 | 3    |
|           | ko04626 | Plant-pathogen interaction               | 0.0215311   | 0.0082429 | 9    |
|           | ko00910 | Nitrogen metabolism                      | 0.033783784 | 0.0154699 | 5    |
|           | ko00906 | Carotenoid biosynthesis                  | 0.057692308 | 0.0266419 | 3    |
|           | ko03010 | Ribosome                                 | 0.317140238 | 7.99E-20  | 1038 |
|           | ko00940 | Phenylpropanoid biosynthesis             | 0.397350993 | 3.00E-05  | 120  |
| T72_vs_CK | ko00941 | Flavonoid biosynthesis                   | 0.549019608 | 0.0097497 | 28   |
|           | ko00500 | Starch and sucrose metabolism            | 0.307823129 | 0.0097497 | 181  |
|           | ko04626 | Plant-pathogen interaction               | 0.311004785 | 0.0366275 | 130  |

---

**Table S4** Metabolite difference screening results

| Compared Samples | Num. of Total Ident. | Num. of Total Sig. | Num. of Sig.Up | Num. of Sig.down |
|------------------|----------------------|--------------------|----------------|------------------|
| T24.vs.CK_pos    | 666                  | 127                | 110            | 17               |
| T48.vs.CK_pos    | 666                  | 155                | 113            | 42               |
| T72.vs.CK_pos    | 666                  | 200                | 154            | 46               |
| T48.vs.T24_pos   | 666                  | 44                 | 20             | 24               |
| T72.vs.T24_pos   | 666                  | 98                 | 58             | 40               |
| T72.vs.T48_pos   | 666                  | 20                 | 10             | 10               |
| T24.vs.CK_neg    | 432                  | 61                 | 48             | 13               |
| T48.vs.CK_neg    | 432                  | 82                 | 52             | 30               |
| T72.vs.CK_neg    | 432                  | 109                | 59             | 50               |
| T48.vs.T24_neg   | 432                  | 19                 | 11             | 8                |
| T72.vs.T24_neg   | 432                  | 47                 | 18             | 29               |
| T72.vs.T48_neg   | 432                  | 22                 | 6              | 16               |

VIP > 1.0, FC > 1.5, FC < 0.667, P value < 0.05

**Table S5** QRT-PCR primers

| Gene           | Forward primer (5' to 3') | Reverse primer (5' to 3') |
|----------------|---------------------------|---------------------------|
| <i>Actin</i>   | GTCCTTTCAGGAGGTACAACC     | CCACATCTGCTGGAAGGTGC      |
| <i>SaPAL2</i>  | ATGCTACCTTTGGCTTGA        | CCACCATACGCTTTACCT        |
| <i>SaC4H3</i>  | ATAAGAATGAGTCGCCAAAT      | GGAAGGGAAGAGGAACAC        |
| <i>SaCOMT1</i> | GTCGGATTGGCTCACATT        | GATACTCGGCTTCTGGTT        |
| <i>Sa4CL3</i>  | CAACCGAGTATTCTTCAT        | GCTGCTACTCTTGCTCTT        |
| <i>SaCCR</i>   | TGTGGCAGTTGATGAGTC        | TACATCCCATGCTGTTTT        |
| <i>SaCADH</i>  | TTGGAGGGAGAAGTGCTA        | CTTGAAAGACAACGGATT        |
| <i>SaPOD5</i>  | TTGGTGGCATTATCTGGT        | AGGCGTCTATGTTGGTCT        |
| <i>SaUGT</i>   | AATGGTCTTGTGCTGCTT        | TCCAAGTTCCACCGTCCC        |
| <i>SaHCT2</i>  | GGCTGGTGGTGGCTTGTA        | TGGCTCGTGGCCTAGATG        |
| <i>SaCYM</i>   | GACTTTAGGCTACTGCCATTC     | CTCCTCAGGCTTCATTCC        |
| <i>SaFHD</i>   | CACCCTGGGAACACTAAG        | GTTGAATCCGACCTACCT        |
| <i>SaANS</i>   | TAAGCGTGACTTGCCAT         | TTTCTCCAGCCTCCCATC        |
| <i>SaCHS5</i>  | GGTTATGTTTAGTGGGTTG       | CCAGATAGTGATGGAGCA        |
| <i>SaCHIS2</i> | CAGTTGGGAGTTATGGTG        | AGGTGATTGCCTGTAGAA        |
| <i>SaANR2</i>  | TCTAGGTGATGTGGGACT        | ACTTTGTTGGAAATACGC        |
| <i>SaFLS</i>   | AGAAGGATAAGGGCAGAC        | CTTGGGAGGTGAAGAAAT        |

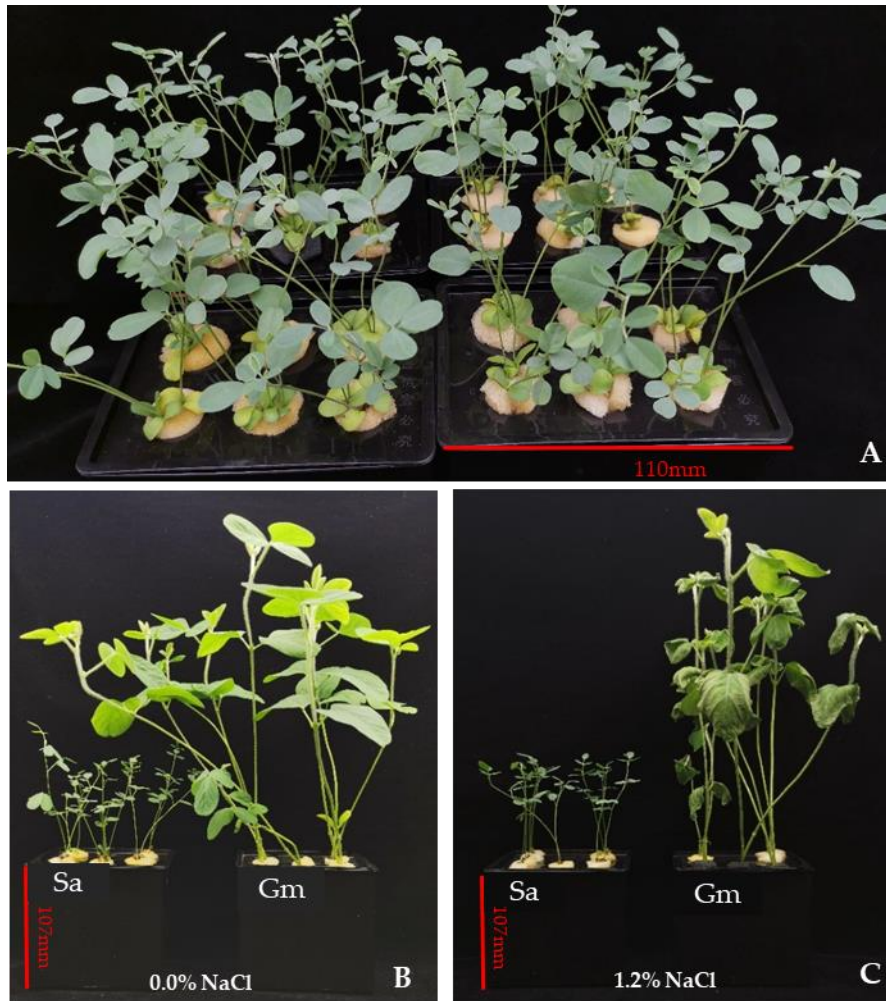

**Figure S1** *Sophora alopecuroides* (A) Four-week-old *S. alopecuroides* seedlings; (B) Four-week-old *S. alopecuroides* (Sa) and *Glycine max* (Gm, Williams 82) seedlings with 1/8 Hoagland's nutrient solution; (C) Four-week-old *S. alopecuroides* (Sa) and *Glycine max* (Gm, Williams 82) seedlings with 1.2% NaCl.

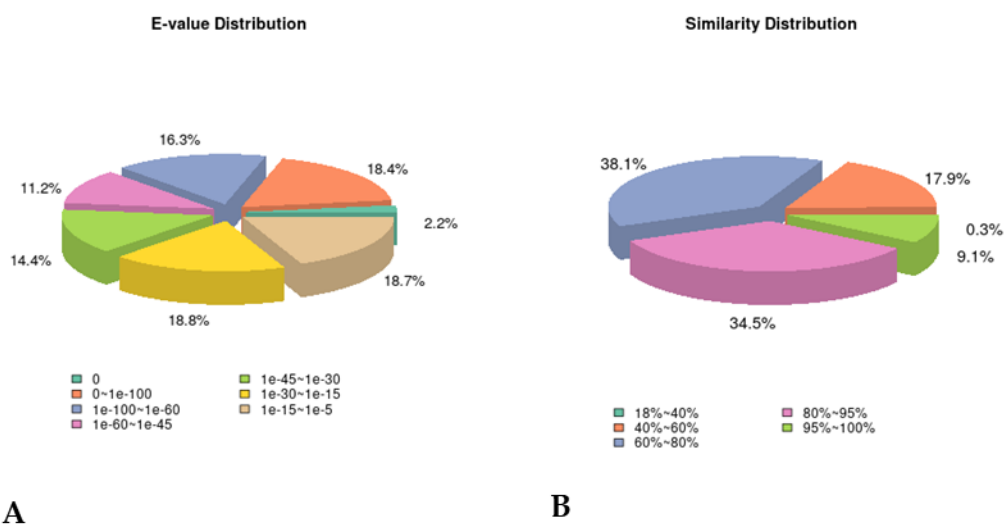

**Figure S2.** Overview of a time course of *S. alopecuroides* transcriptome responses to salt stress. (A) PCA plots of transcripts identified by RNA-seq of salt-stressed *S. alopecuroides* roots at 0, 4, 24, 48, and 72

hours after stress. (B) Species classification statistics map of the transcriptome NR library comparison of *S. alopecuroides*. (C) KOG annotated classification chart. The X axis is the names of the 26 KOG groups, and the Y axis is the proportion of the number of genes annotated to the group to the total number of genes annotated.

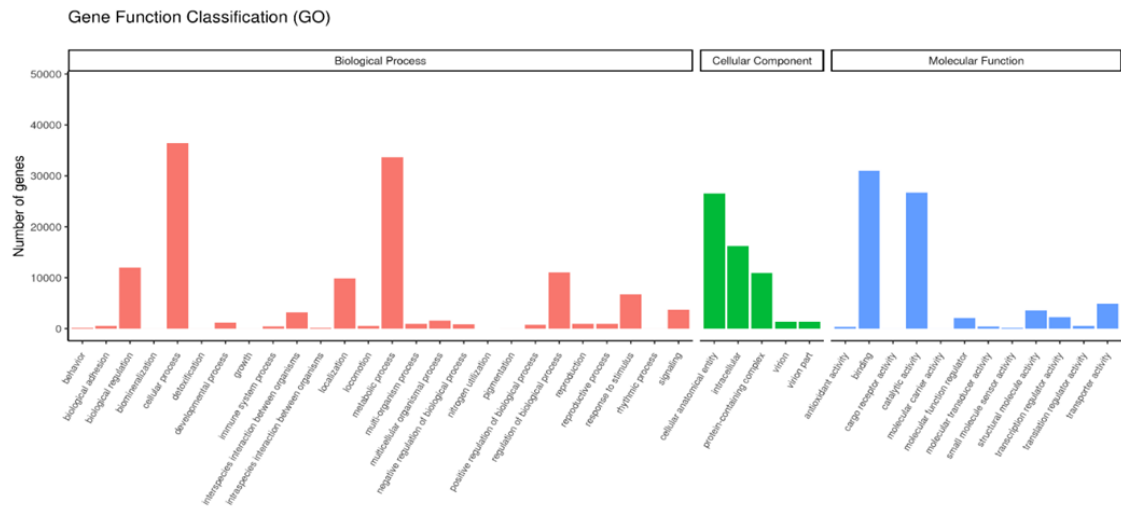

**Figure S3.** GO annotation classification chart. The X-axis is GO Term, and the Y-axis is the number of genes annotated to the Term.

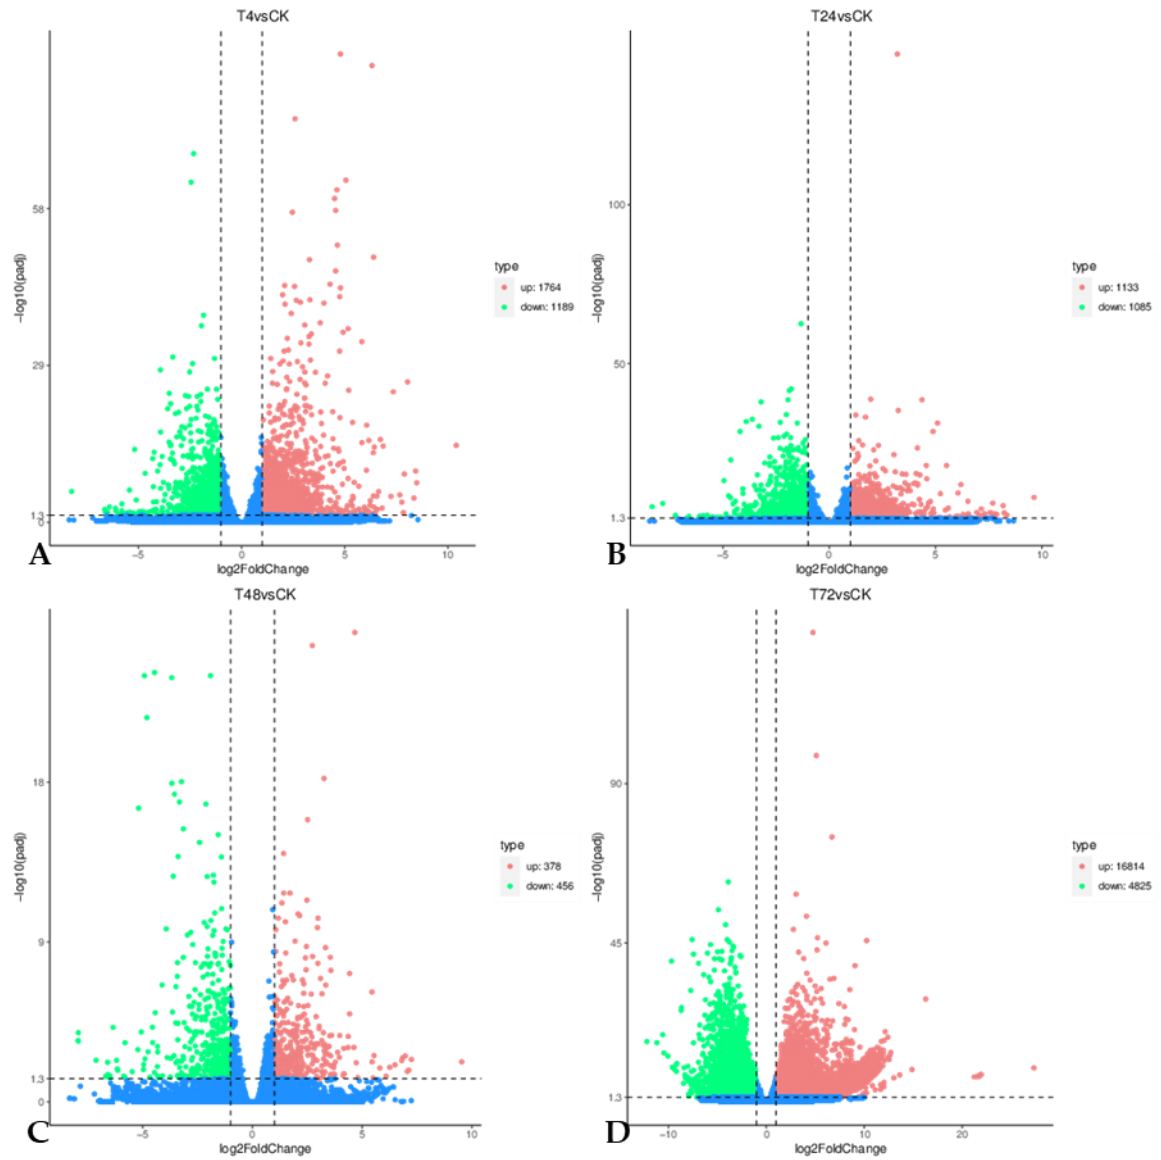

**Figure S4.** Differential gene volcano map. The abscissa is the log<sub>2</sub>FoldChange value, the ordinate is -log<sub>10</sub>pvalue, and the blue dotted line represents the threshold line of the differential gene screening criteria.

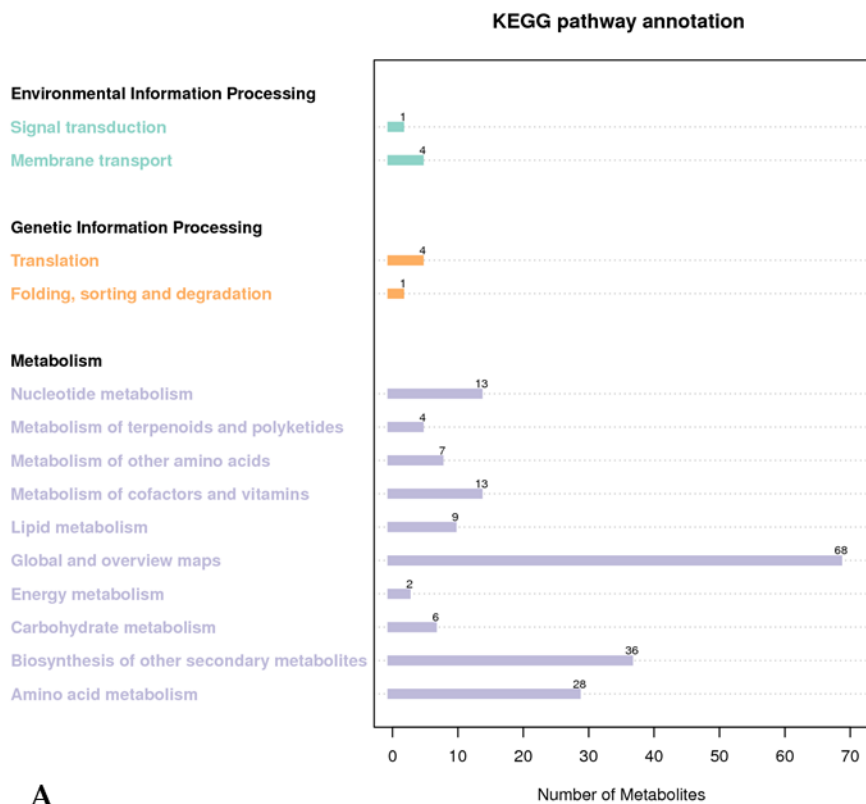

**A**

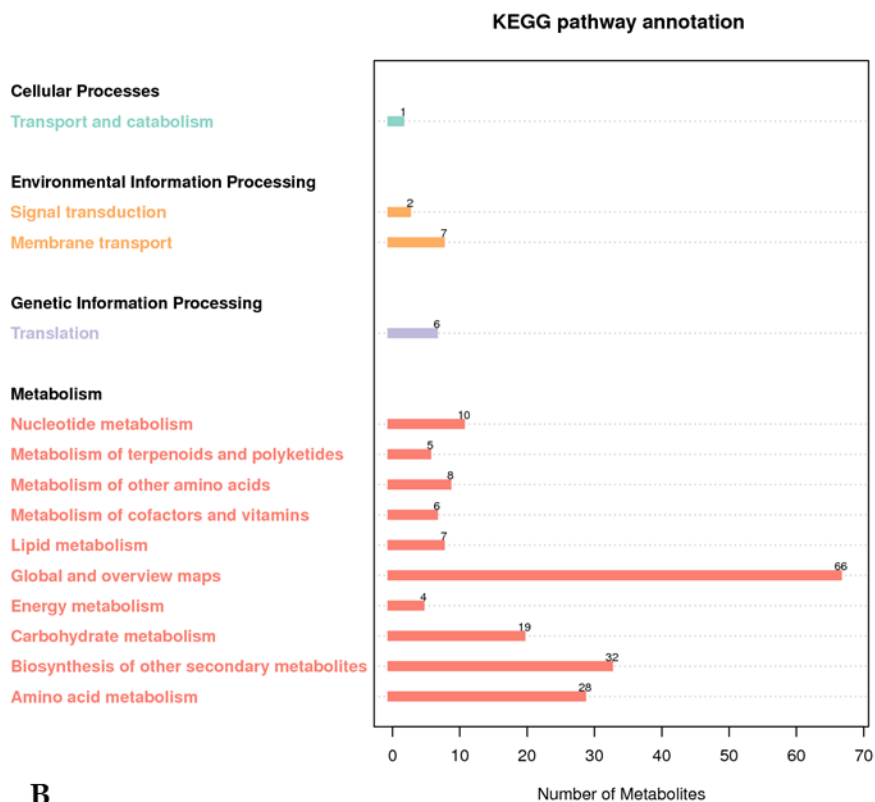

**B**

**Figure S5.** KEGG pathway notes (A, positive ion mode; B, negative ion mode). The abscissa represents the number of metabolites, and the ordinate represents the annotated KEGG pathway; it shows the number of metabolites annotated in each second-level classification of Pathway.
